# Supplementary material for: Adherence to Dietary Recommendations of 7-Year-Old Children from a Birth Cohort in Friuli Venezia Giulia, Italy
Source: MDPI journal article supplement (doi:10.3390/nu14030515), 2022-01-25
Supplement: s1 [file s1]

## Supplementary Materials

### Adherence to Dietary Recommendations of 7-Year-old Children from a Birth Cohort in Friuli Venezia Giulia, Italy

Elisa Giordani, Michela Marinoni, Federica Fiori, Federica Concina, Luca Ronfani, Patrizia Dalmin, Fabio Barbone, Valeria Edefonti and Maria Parpinel

**Table S1.** Parents general information at delivery. Northern Adriatic Cohort II (NAC-II), 2014–2016 (*N* = 381).

|                                     | N   | %    |
|-------------------------------------|-----|------|
| <b>Maternal nationality</b>         |     |      |
| Italian                             | 353 | 92.6 |
| Foreign                             | 24  | 6.3  |
| Not reported                        | 4   | 1.1  |
| <b>Maternal marital status</b>      |     |      |
| Married/living with partner         | 342 | 89.7 |
| Separated/divorced                  | 12  | 3.1  |
| Single/not living with partner      | 25  | 6.6  |
| Not reported                        | 2   | 0.5  |
| <b>Maternal education</b>           |     |      |
| Completed primary school            | 4   | 1.0  |
| Completed secondary school          | 57  | 15.0 |
| Completed high school or equivalent | 172 | 45.1 |
| Bachelor degree or higher           | 147 | 38.6 |
| Not reported                        | 1   | 0.3  |
| <b>Paternal education</b>           |     |      |
| Completed primary school            | 4   | 1.0  |
| Completed secondary school          | 106 | 27.8 |
| Completed high school or equivalent | 179 | 47.0 |
| Bachelor degree or higher           | 84  | 22.0 |
| Not reported                        | 8   | 2.1  |

**Table S2.** Percentage contribution of food groups to total intake of fatty acids and cholesterol. NAC-II, 2014–2016 (*N* = 381).

|                                      | %           |             |             |             |             |             |             |             |             |             |
|--------------------------------------|-------------|-------------|-------------|-------------|-------------|-------------|-------------|-------------|-------------|-------------|
|                                      | SFAs        | MUFAs       | PUFAs       | OA          | LA          | ALA         | ARA         | EPA         | DHA         | Chol        |
| Cereals and cereal-based products    | 5.4         | 7.5         | <b>12.9</b> | 7.7         | <b>15.1</b> | 9.3         | 0.5         | 5.3         | 0.0         | 6.0         |
| Potatoes                             | 0.2         | 0.0         | 2.7         | 0.0         | 2.7         | 6.0         | 0.0         | 0.0         | 0.0         | 0.0         |
| Pulses                               | 0.1         | 0.1         | 0.5         | 0.1         | 0.4         | 1.8         | 0.0         | 0.0         | 0.0         | 0.0         |
| Vegetables                           | 0.2         | 0.1         | 1.6         | 0.1         | 1.2         | 6.4         | 0.0         | 0.0         | 0.0         | 0.0         |
| Fresh and squeezed fruit             | 0.2         | 0.2         | 1.4         | 0.2         | 1.3         | 4.3         | 0.0         | 0.0         | 0.0         | 0.0         |
| Dry fruit and seeds                  | 0.2         | 0.8         | 3.6         | 0.8         | 4.0         | 3.8         | 0.0         | 0.0         | 0.0         | 0.0         |
| Milk, dairy products and substitutes | <b>41.2</b> | <b>22.6</b> | 8.5         | <b>21.1</b> | 6.5         | <b>32.8</b> | 0.0         | 0.0         | 0.0         | <b>24.3</b> |
| Meat and meat products               | 6.0         | 7.4         | <b>13.1</b> | 7.0         | <b>11.7</b> | 6.1         | <b>48.6</b> | <b>20.5</b> | <b>12.8</b> | <b>21.5</b> |
| Cured meat                           | 5.4         | 8.0         | 9.7         | 7.7         | <b>10.1</b> | 5.9         | <b>29.5</b> | 7.5         | 1.0         | 6.7         |
| Fish and fish products               | 0.9         | 1.3         | 5.1         | 1.0         | 2.1         | 1.1         | 9.7         | <b>66.8</b> | <b>86.1</b> | 5.9         |
| Eggs                                 | 1.6         | 1.5         | 2.5         | 1.5         | 2.7         | 0.7         | 9.9         | 0.0         | 0.0         | <b>21.3</b> |
| Fats and oils                        | 6.6         | <b>33.0</b> | <b>18.8</b> | <b>35.2</b> | <b>22.8</b> | 9.4         | 0.1         | 0.0         | 0.0         | 0.0         |
| Sweets and salty snacks              | <b>31.3</b> | <b>17.0</b> | <b>17.2</b> | <b>16.9</b> | <b>16.6</b> | <b>11.2</b> | 1.6         | 0.0         | 0.0         | <b>14.3</b> |
| Sugar-sweetened beverages and juices | 0.0         | 0.0         | 0.1         | 0.0         | 0.1         | 0.1         | 0.0         | 0.0         | 0.0         | 0.0         |
| Sauces and soups                     | 0.4         | 0.4         | 1.8         | 0.4         | 2.3         | 0.1         | 0.0         | 0.0         | 0.0         | 0.1         |
| Vegetable and meat broths            | 0.1         | 0.2         | 0.2         | 0.2         | 0.3         | 0.2         | 0.0         | 0.0         | 0.0         | 0.0         |
| Herbs, spices and added salt         | 0.0         | 0.0         | 0.1         | 0.0         | 0.1         | 0.8         | 0.0         | 0.0         | 0.0         | 0.0         |
| Non-sweetened beverages              | 0.0         | 0.0         | 0.0         | 0.0         | 0.0         | 0.0         | 0.0         | 0.0         | 0.0         | 0.0         |

The major food group contributors for each micronutrient were indicated in bold typeface. Abbreviations: SFAs, saturated fatty acids; MUFAs, monounsaturated fatty acids; PUFAs, polyunsaturated fatty acids; OA, oleic acid; LA, linoleic acid; ALA, alpha-linolenic acid; ARA, arachidonic acid; EPA, eicosapentaenoic acid; DHA, docosahexaenoic acid; Chol, cholesterol.

**Table S3.** Percentage contribution of food groups to total intake of micronutrients. NAC-II, 2014–2016 (*N* = 381).

|                                      | %           |             |             |             |             |             |             |             |             |             |             |             |             |             |             |             |             |
|--------------------------------------|-------------|-------------|-------------|-------------|-------------|-------------|-------------|-------------|-------------|-------------|-------------|-------------|-------------|-------------|-------------|-------------|-------------|
|                                      | Na          | K           | Ca          | Fe          | Zn          | Mg          | P           | Se          | VitB1       | VitB2       | VitB3       | VitB6       | VitB9       | VitB12      | VitC        | VitD        | VitE        |
| Cereals and cereal-based products    | <b>34.4</b> | <b>14.5</b> | 5.9         | <b>22.4</b> | <b>25.7</b> | 2.6         | <b>17.9</b> | 0.8         | <b>28.7</b> | <b>16.9</b> | <b>20.1</b> | <b>19.4</b> | <b>30.6</b> | 0.0         | 2.5         | 3.9         | 9.8         |
| Potatoes                             | 0.2         | <b>8.0</b>  | 0.5         | 2.5         | 1.1         | 0.0         | 1.7         | 0.0         | 3.5         | 1.0         | 6.3         | 8.8         | 5.3         | 0.0         | 5.1         | 0.0         | 0.3         |
| Pulses                               | 0.2         | 2.8         | 1.1         | 4.3         | 1.5         | 0.0         | 1.9         | 0.0         | 5.0         | 1.6         | 1.4         | 1.3         | 5.2         | 0.0         | 2.5         | 0.0         | 0.7         |
| Vegetables                           | 2.1         | <b>12.3</b> | 5.0         | <b>12.0</b> | 5.0         | 4.4         | 4.1         | 0.9         | 6.7         | 7.7         | 7.4         | <b>10.2</b> | <b>21.1</b> | 0.0         | <b>29.0</b> | 0.6         | <b>18.5</b> |
| Fresh and squeezed fruit             | 0.2         | <b>15.7</b> | 3.5         | 9.0         | 2.7         | <b>18.5</b> | 3.0         | 2.4         | 7.2         | 4.7         | 5.0         | <b>11.3</b> | 7.6         | 0.0         | <b>34.7</b> | 0.0         | 7.5         |
| Dry fruit and seeds                  | 0.0         | 0.4         | 0.1         | 0.5         | 0.6         | 1.7         | 0.4         | 0.2         | 0.6         | 0.2         | 0.3         | 0.4         | 0.4         | 0.0         | 0.0         | 0.0         | 1.2         |
| Milk, dairy products and substitutes | <b>13.2</b> | <b>17.9</b> | <b>69.1</b> | 4.7         | <b>22.3</b> | <b>34.9</b> | <b>36.1</b> | <b>21.7</b> | <b>11.0</b> | <b>39.5</b> | 2.5         | <b>11.4</b> | <b>10.8</b> | <b>33.9</b> | 2.5         | <b>10.7</b> | 5.8         |
| Meat and meat products               | 6.6         | <b>11.1</b> | 1.1         | <b>13.6</b> | <b>20.7</b> | <b>16.6</b> | <b>13.4</b> | <b>29.4</b> | <b>13.9</b> | <b>11.2</b> | <b>36.6</b> | <b>20.0</b> | 3.8         | <b>23.8</b> | 0.0         | <b>22.1</b> | 2.3         |
| Cured meat                           | <b>10.8</b> | 2.9         | 0.4         | 2.8         | 7.2         | 4.0         | 5.3         | 4.2         | <b>10.7</b> | 3.0         | 6.1         | 7.0         | 1.4         | 6.1         | 0.0         | <b>10.1</b> | 0.2         |
| Fish and fish products               | 2.5         | 3.0         | 1.3         | 4.5         | 4.3         | 5.1         | 4.3         | <b>35.9</b> | 1.7         | 2.0         | 7.5         | 3.7         | 1.0         | <b>27.6</b> | 0.2         | <b>22.3</b> | 4.0         |
| Eggs                                 | 0.8         | 0.8         | 0.9         | 2.6         | 2.0         | 1.6         | 2.7         | 2.7         | 1.3         | 2.9         | 0.1         | 1.0         | 3.1         | 8.6         | 0.0         | <b>14.6</b> | 2.2         |
| Fats and oils                        | 0.1         | 0.2         | 0.1         | 0.5         | 0.1         | 0.0         | 0.0         | 0.0         | 0.1         | 0.1         | 0.1         | 0.0         | 0.0         | 0.0         | 0.1         | 0.0         | <b>32.9</b> |
| Sweets and salty snacks              | 8.9         | 6.5         | 8.2         | <b>15.3</b> | 6.0         | 3.3         | 8.0         | 0.1         | 6.3         | 7.1         | 4.2         | 3.8         | 4.5         | 0.1         | 1.3         | <b>15.5</b> | 9.9         |
| Sugar-sweetened beverages and juices | 0.4         | 2.7         | 1.4         | 2.9         | 0.7         | 4.5         | 0.8         | 0.5         | 1.1         | 0.9         | 1.1         | 1.3         | 1.8         | 0.0         | <b>21.2</b> | 0.0         | 3.4         |
| Sauces and soups                     | 0.9         | 0.0         | 0.0         | 0.1         | 0.1         | 0.0         | 0.0         | 0.0         | 0.0         | 0.0         | 0.0         | 0.0         | 0.0         | 0.0         | 0.0         | 0.1         | 1.0         |
| Vegetable and meat broths            | 4.5         | 0.3         | 0.6         | 0.5         | 0.1         | 0.9         | 0.2         | 1.1         | 1.9         | 0.5         | 0.8         | 0.2         | 2.5         | 0.0         | 0.0         | 0.0         | 0.0         |
| Herbs, spices and added salt         | <b>14.1</b> | 0.4         | 0.6         | 1.6         | 0.2         | 0.7         | 0.1         | 0.0         | 0.1         | 0.2         | 0.2         | 0.2         | 0.4         | 0.0         | 0.9         | 0.0         | 0.2         |
| Non-sweetened beverages              | 0.0         | 0.4         | 0.0         | 0.2         | 0.0         | 1.1         | 0.1         | 0.0         | 0.1         | 0.5         | 0.2         | 0.0         | 0.5         | 0.0         | 0.0         | 0.0         | 0.0         |

The major food group contributors for each micronutrient were indicated in bold typeface. Abbreviation: Vit, vitamin.
